# Supplementary material for: Specificity of end resection pathways for double-strand break regions containing ribonucleotides and base lesions
Source: PubMed Central journal article supplement (PMC7303207; doi:10.1038/s41467-020-16903-4), 2020-06-18
Supplement: 41467_2020_16903_MOESM1_ESM.pdf [file 41467_2020_16903_MOESM1_ESM.pdf]

**Supplementary Information**

**Specificity of end resection pathways for double-strand break regions containing  
ribonucleotides and base lesions**

**Daley et al.**

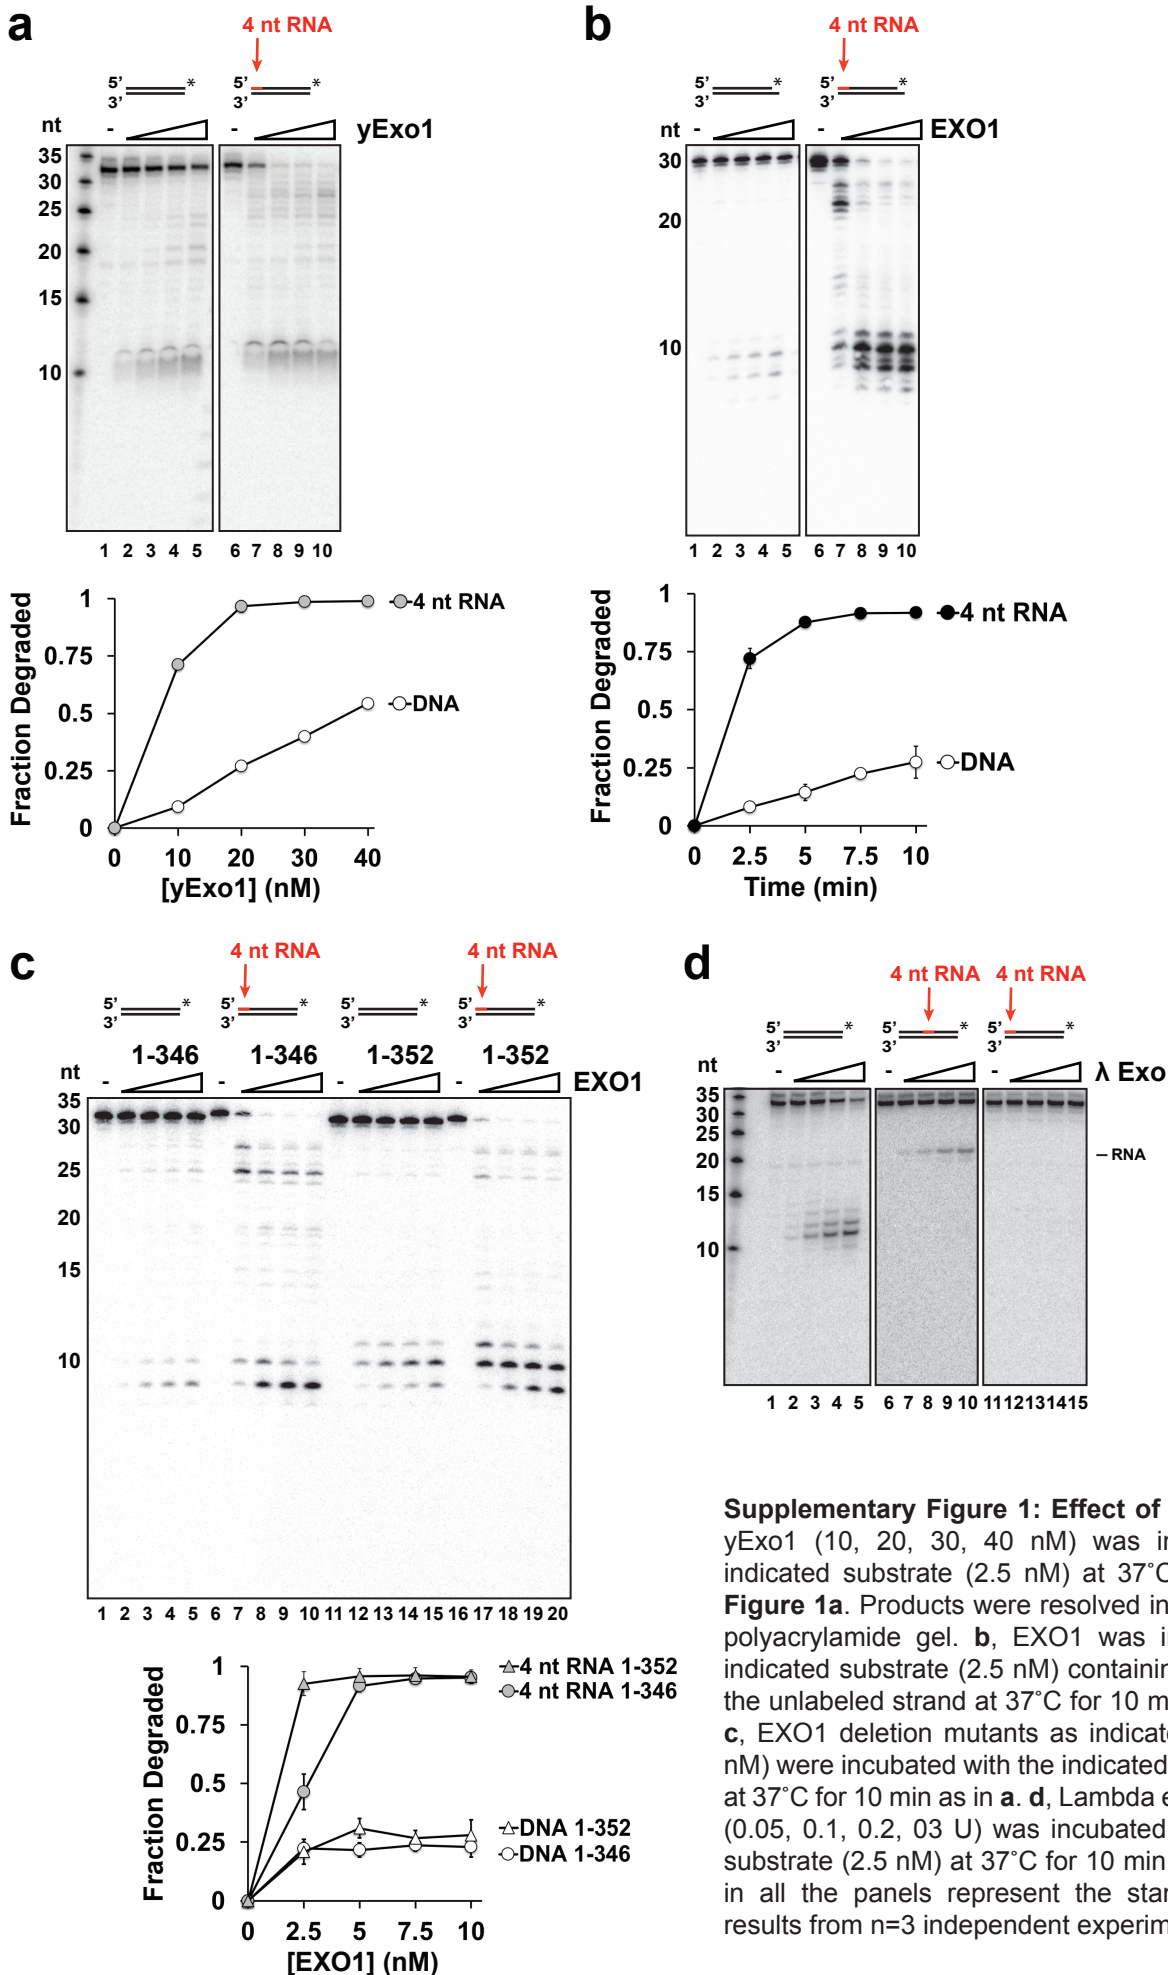

**Supplementary Figure 1: Effect of RNA on EXO1.** **a**, yExo1 (10, 20, 30, 40 nM) was incubated with the indicated substrate (2.5 nM) at 37°C for 10 min as in **Figure 1a**. Products were resolved in a 20% denaturing polyacrylamide gel. **b**, EXO1 was incubated with the indicated substrate (2.5 nM) containing 5' overhangs on the unlabeled strand at 37°C for 10 min as in **Figure 1a**. **c**, EXO1 deletion mutants as indicated (2.5, 5, 7.5, 10 nM) were incubated with the indicated substrate (2.5 nM) at 37°C for 10 min as in **a**. **d**, Lambda exonuclease (NEB) (0.05, 0.1, 0.2, 0.3 U) was incubated with the indicated substrate (2.5 nM) at 37°C for 10 min as in **a**. Error bars in all the panels represent the standard deviation of results from n=3 independent experiments.



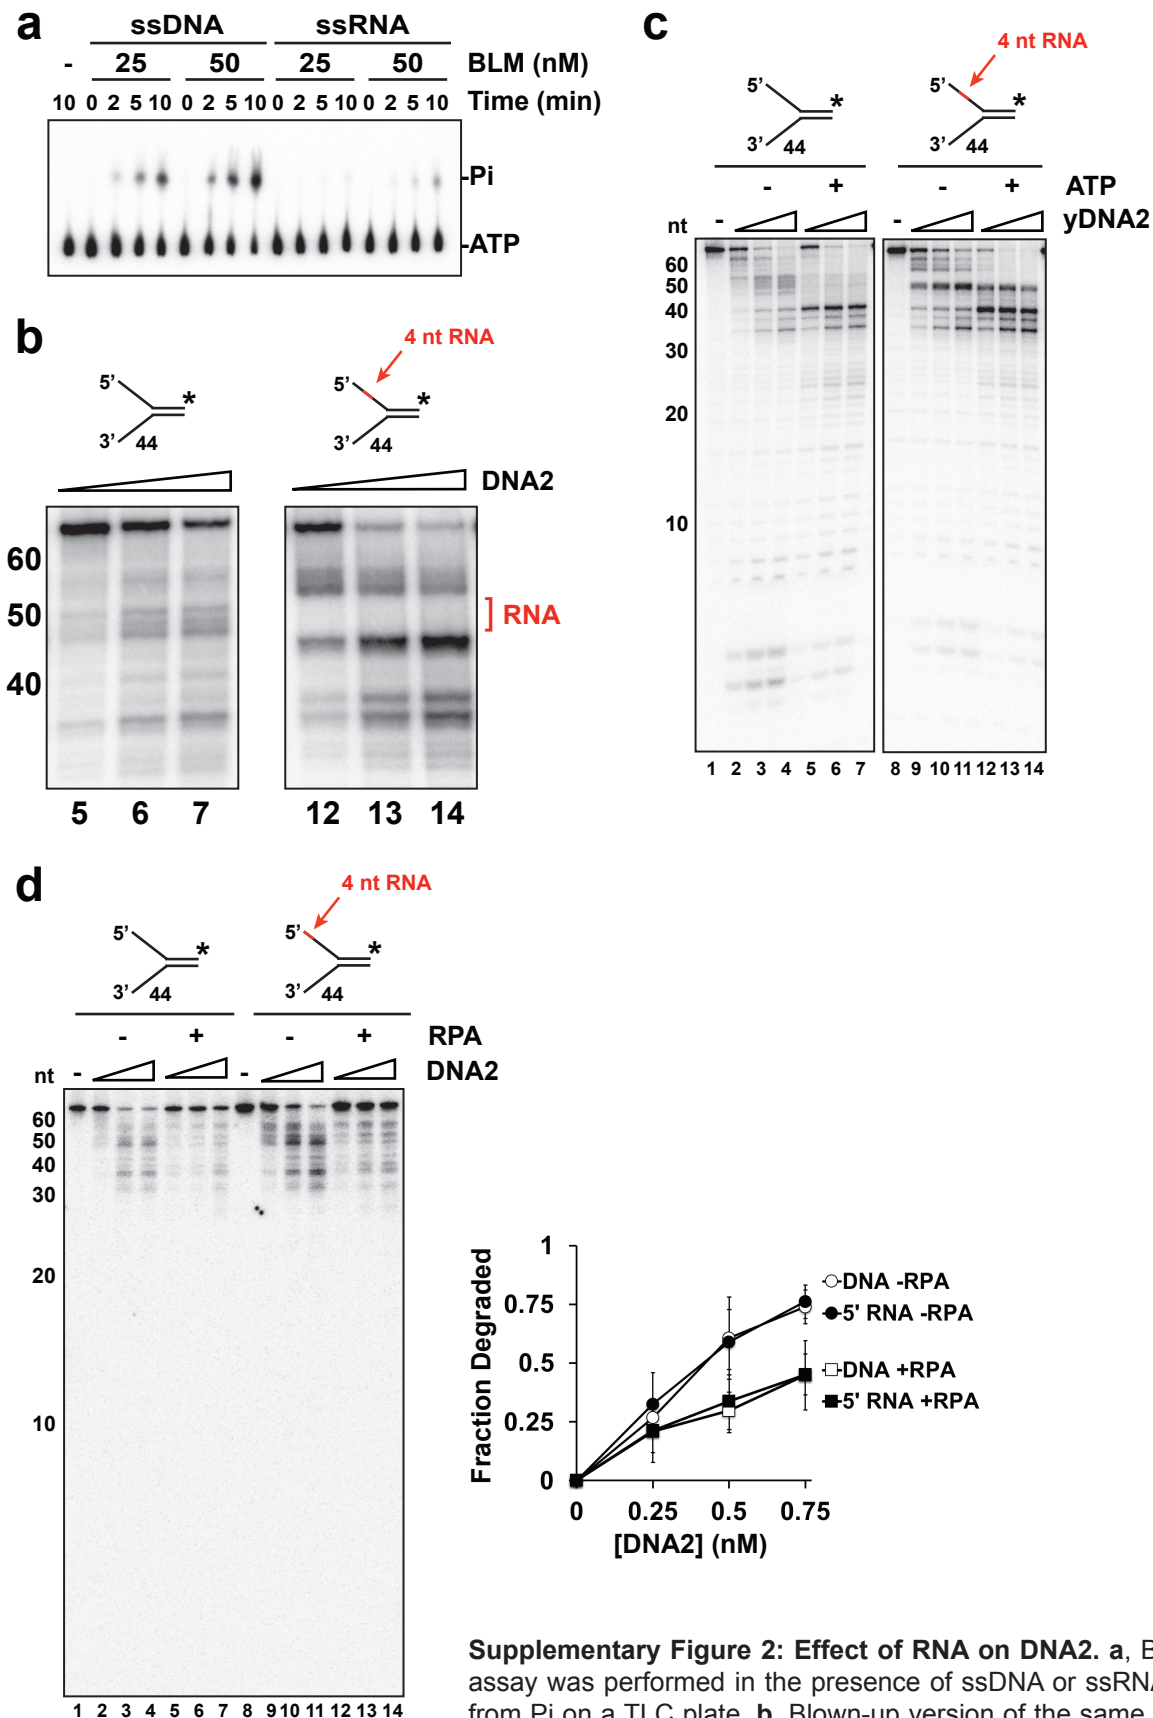

**Supplementary Figure 2: Effect of RNA on DNA2.** **a**, BLM (25 or 50 nM) ATPase assay was performed in the presence of ssDNA or ssRNA, and ATP was separated from Pi on a TLC plate. **b**, Blown-up version of the same gel shown in **Figure 4a**. **c**, yDna2 (0.25, 0.5, 0.75 nM) was incubated with the indicated Y shaped substrate (2.5 nM) at 30°C for 5 min in the presence or absence of 2 mM ATP. Reaction mixtures were resolved in a 20% denaturing polyacrylamide gel. **d**, DNA2 (0.25, 0.5, 0.75 nM) was incubated with the indicated Y shaped substrate (2.5 nM) at 37°C for 5 min in the presence of 2 mM ATP, with or without RPA (10 nM). Error bars in all the panels represent the standard deviation of results from n=3 independent experiments.

**a**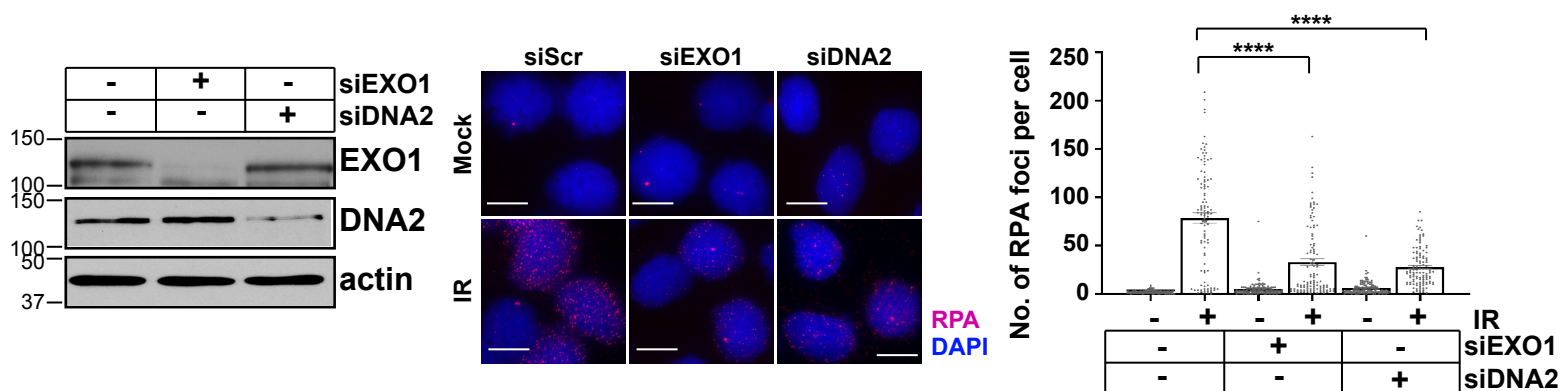**b**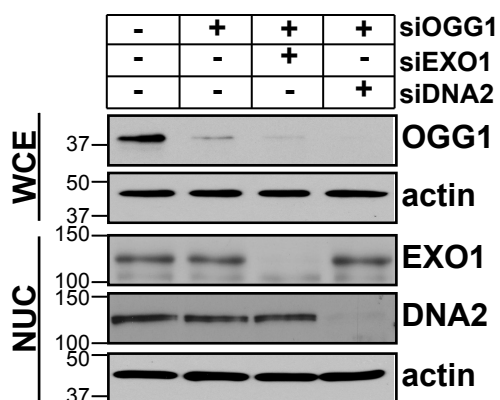**c**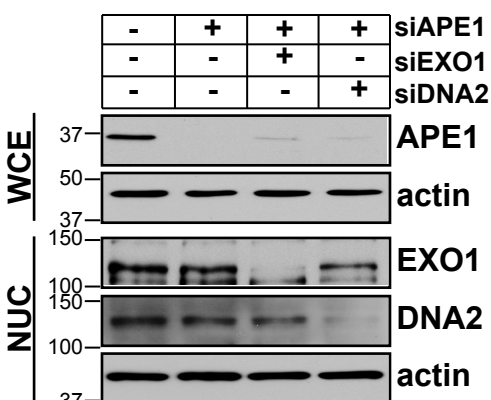**d**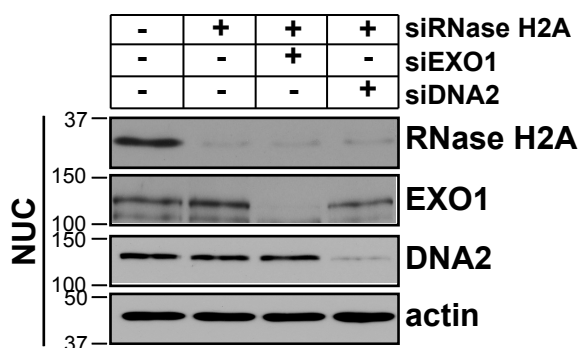

**Supplementary Figure 3: Optimal RPA foci formation depends on both EXO1 and DNA2.** **a**, U2OS cells were depleted of EXO1 or DNA2 using siRNA as indicated, and knockdown verified by western blotting. Cells were screened for resection defects by quantifying IR-induced RPA foci 3hr after treatment with 6Gy IR. Representative images of mock-irradiated or irradiated (IR) cells immunostained with anti-RPA antibody (red) are shown. Nuclei were stained with 4',6-diamidino-2-phenylindole (blue). Average numbers of RPA foci per nucleus are plotted. All experiments were replicated three times. Error bars depict standard error of the mean and \*\*\*\* indicates  $p < 0.0001$ ; two-tailed unpaired-t-test. The scale bar represents 10  $\mu$ m for all images. **b**, U2OS cells were depleted of OGG1, EXO1 or DNA2 using siRNA as indicated, and knockdown verified by western blotting. **c**, U2OS cells were depleted of APE1, EXO1 or DNA2 using siRNA as indicated, and knockdown verified by western blotting. **d**, U2OS cells were depleted of RNase H2A, EXO1 or DNA2 using siRNA as indicated, and knockdown verified by western blotting. WCE, whole cell extract; NUC, nuclear extract.

**Figure 2a**

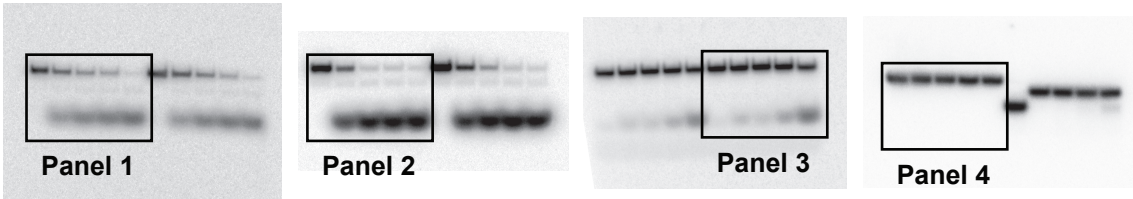

**Figure 2b**

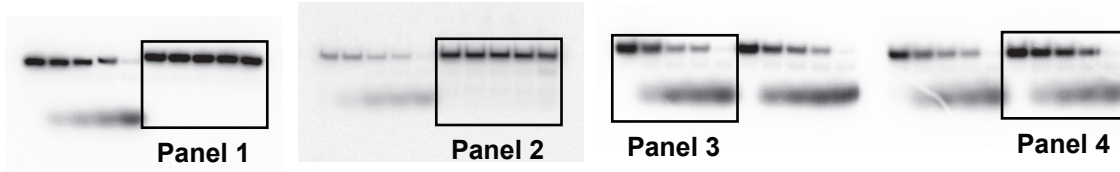

**Figure 3b**

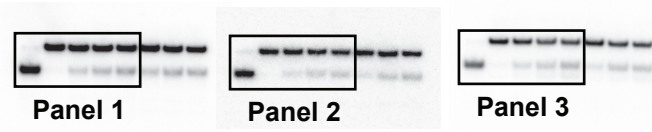

**Figure 3c**

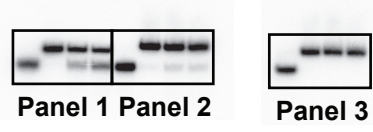

**Figure 3d**

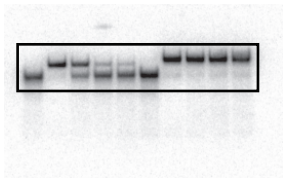

**Figure 5c**

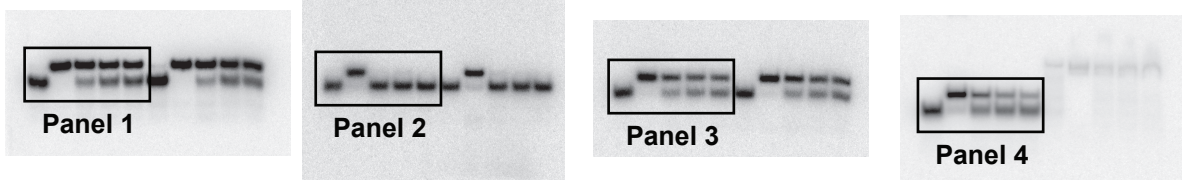

**Supplementary Figure 4: Uncropped gels.** Black rectangles indicate cropping locations.

**Supplementary Figure 3a**

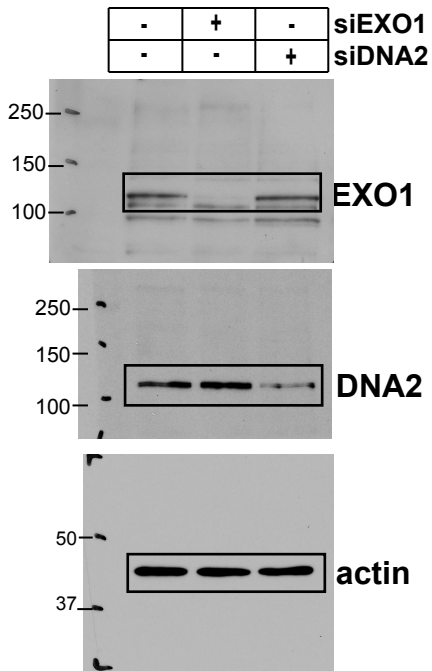

**Supplementary Figure 3b**

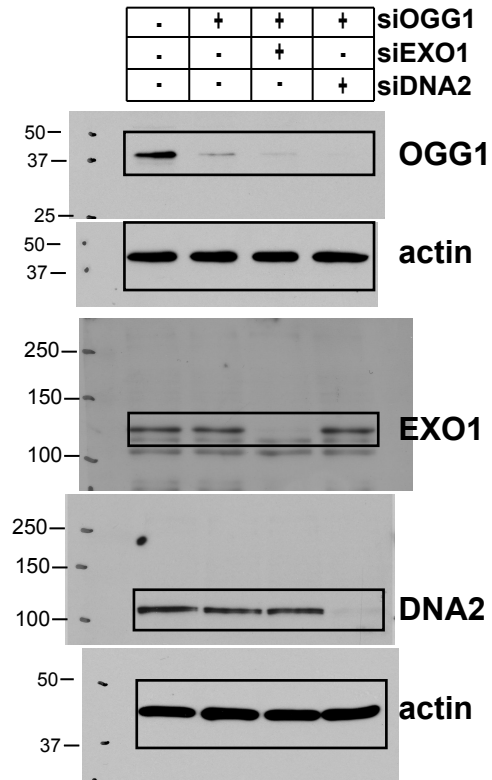

**Supplementary Figure 3c**

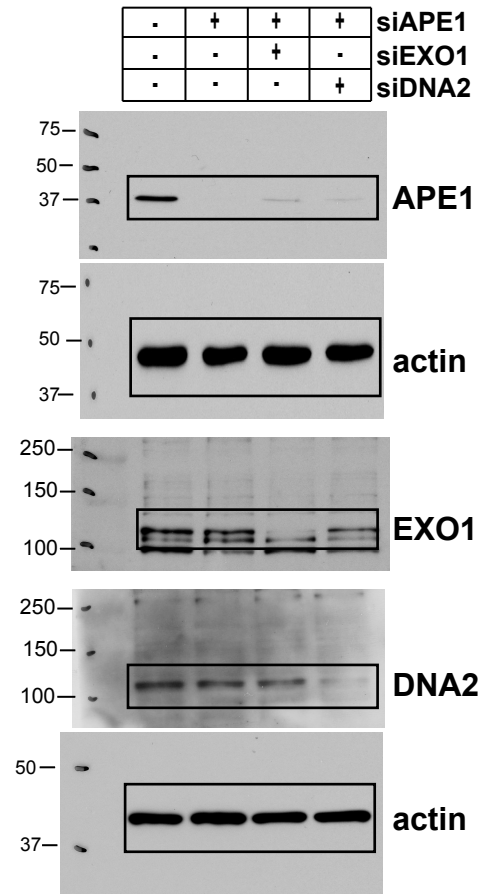

**Supplementary Figure 3d**

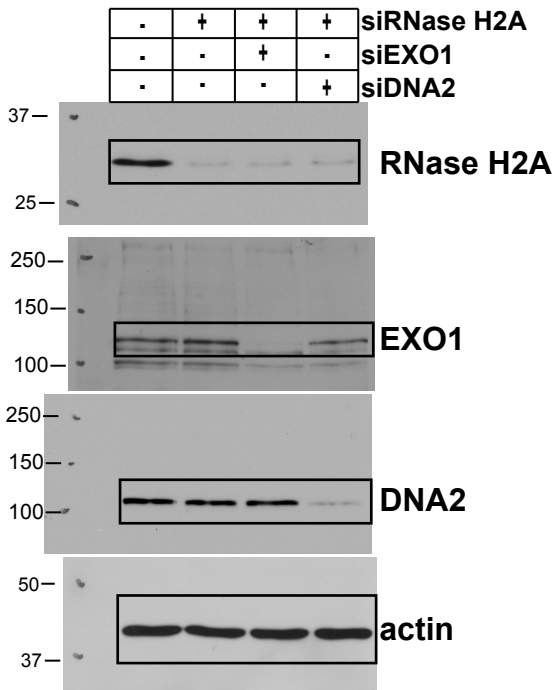

**Supplementary Figure 5: Uncropped western blots.** Black rectangles indicate cropping locations.

**Supplementary Table 1:** Sequences of oligonucleotides used in this study. Ribonucleotides are indicated in red, and alternative bases are shown in bold between parenthesis.

| Name      | Sequence                                                                    | Description                           |
|-----------|-----------------------------------------------------------------------------|---------------------------------------|
| PSOL9816  | GGACATCTTTGCCACCTGGTGGTGGGACC                                               | 30 bp dsDNA substrate                 |
| PSOL9817  | GGTCCCACCACCAGGTGGGCAAAGATGTCC                                              | 30 bp dsDNA substrate                 |
| PSOL10488 | GGACATCTTTGCCACCTGGTGGTGGGACC                                               | 1-nt 5' RNA version of PSOL9816       |
| PSOL10208 | GGACATCTTTGCCACCTGGTGGTGGGACC                                               | 4-nt 5' RNA version of PSOL9816       |
| PSOL11407 | GGACAUCUUUGCCACCTGGTGGTGGGACC                                               | 10-nt 5' RNA version of PSOL9816      |
| PSOL9275  | GTAAGTGCCGCGGTGCGGGTGCCAGGGCGTGCCCT                                         | Nick substrate (top left)             |
| PSOL9276  | TGGGCTCCCCGGGCGGTACTCCACCTCATGCATC                                          | Nick substrate (top right)            |
| PSOL10489 | UGGGCTCCCCGGGCGGTACTCCACCTCATGCATC                                          | 4-nt 5' RNA version of PSOL9276       |
| PSOL9022  | GATGCATGAGGTGGAGTACGCGCCCGGGAGCCCAAGGGCACGCCCTGGCACCCGCACCGCGGCACTTAC       | Nick substrate (bottom)               |
| PSOL9822  | GGACAUCUUUGCCACCUUGGUGGUGGGACC                                              | RNA version of PSOL9816               |
| PSOL9823  | GGUCCCACCACCAGGUGGGCAAAGAUGUCC                                              | RNA version of PSOL9817               |
| PSOL11408 | GGTCCCACCACCAGGTGGGCAAAGATGTCCGATCA                                         | 4-nt 3' tail version of PSOL9817      |
| PSOL11708 | GGACAUCUTTGCCACCTGGTGGTGGGACC                                               | 4-nt internal RNA version of PSOL9816 |
| PSOL10547 | GGTCCCACCACCAGGUGGGCAAAGAUGUCC                                              | 15-nt 3' RNA version of PSOL9817      |
| PSOL10545 | GGTCCCACCACCAGGTGGGCAAAGATGTCC                                              | 1-nt 3' RNA version of PSOL9817       |
| PSOL10546 | GGTCCCACCACCAGGTGGGCAAAGATGUCC                                              | 4-nt 3' RNA version of PSOL9817       |
| PSOL10207 | GGACATCTTTGCCACCTGGTGGTGGGACC                                               | 4-nt internal RNA version of PSOL9816 |
| PSOL11408 | GGTCCCACCACCAGGTGGGCAAAGATGTCCGATCA                                         | 5-nt 3' tail version of PSOL9817      |
| PSOL11409 | GGUCCCACCACCAGGUGGGCAAAGAUGUCCGAUCA                                         | RNA version of PSOL11408              |
| PSOL7343  | AGAGGAAAGGAAGAAAGGAGGAAAGGACGTCATAGACGATTACATTGCTAGGACATGCTGTCTAGAGACTATCGC | Y substrate, top                      |
| PSOL7344  | GCGATAGTCTCTAGACAGCATGTCTTAGCAAGCCAGAATTCGGCAGGCTAGAAAGGAGGAAAGAAGGAAAGGAGA | Y substrate, bottom                   |
| PSOL10490 | AGAGGAAAGGAAGAAAGGAGGAAAGGACGTCATAGACGATTACATTGCTAGGACATGCTGTCTAGAGACTATCGC | 4-nt internal RNA version of PSOL7343 |
| PSOL10209 | GGACATCTTT( <b>AP</b> )CCCACCTGGTGGTGGGACC                                  | AP site version of PSOL9816           |
| PSOL10210 | GGACATCTTT( <b>8-O-G</b> )CCCACCTGGTGGTGGGACC                               | 8-oxo-G site version of PSOL9816      |
| PSOL10486 | GGACATCTTTACCCACCTGGTGGTGGGACC                                              | A-C mismatch version of PSOL9816      |
| PSOL11779 | AAGGTCCCACCACCAGGTGGGCAAAGATGTCC                                            | 2-nt 5' overhang version of PSOL9817  |
| PSOL11711 | AGAGGAAAGGAAGAAAGGAGGAAAGGACGTCATAGACGATTACATTGCTAGGACATGCTGTCTAGAGACTATCGC | 4-nt 5' RNA version of PSOL7343       |

**Supplementary Table 2:** siRNA sequences

| Name      | Sequence                          |
|-----------|-----------------------------------|
| OGG1      | GAU CAA GUA UGG ACA CUG A         |
| APE1      | GCC UUU CGC AAG UUC CUG A         |
| RNase H2A | GGA CUU GGA UAC UGA UUA U         |
| EXO1      | AG UGU UUC AGG AUC AAC AUC AUC    |
| DNA2      | UAC AAC AGC ACU CUU AUU CUG CUC C |

**Supplementary Table 3: Antibody sources and dilutions**

| <b>Name</b> | <b>Vendor</b>             | <b>Catalog No.</b> | <b>Western Blot Dilution</b> | <b>Immunofluorescence Dilution</b> |
|-------------|---------------------------|--------------------|------------------------------|------------------------------------|
| OGG1        | Abcam                     | ab124741           | 1:1000                       |                                    |
| APE1        | Santacruz                 | sc-17774           | 1:1000                       |                                    |
| RNase H2A   | Bethyl laboratory         | A304-149A          | 1:1000                       |                                    |
| EXO1        | Bethyl laboratory         | A302-639A          | 1:1000                       |                                    |
| DNA2        | Thermo                    | PA5-68167          | 1:1000                       |                                    |
| Beta-actin  | Cell signaling technology | 12262S             | 1:3000                       |                                    |
| RPA         | Millipore Sigma           | MABE285            |                              | 1:2000                             |
